# Supplementary material
Source: publisher figshare collection journal article supplement (https://gsajournals.figshare.com/articles/dataset/_/10273436)
Supplement: Supplementary file 1 [file 2]

**Table S1. Detrimental effects of KGB-1 activation on resistance to *Pseudomonas aeruginosa* infection depend on *mir-71***

| Strain <sup>a</sup>      | Median survival time (days <sup>c</sup> ) |                   | Median survival fold change <sup>d</sup> | n          |                   | Log-Rank p-value <sup>d</sup> |
|--------------------------|-------------------------------------------|-------------------|------------------------------------------|------------|-------------------|-------------------------------|
|                          | EV control                                | <i>vhp-1</i> RNAi |                                          | EV control | <i>vhp-1</i> RNAi |                               |
| <i>wt</i> <sup>b</sup>   | 7.2                                       | 5.5               | 0.76                                     | 87         | 73                | <0.0001                       |
| <i>daf-12(rh61rh412)</i> | 5.3                                       | 4.1               | 0.77                                     | 66         | 62                | <0.0001                       |
| <i>kri-1(ok1251)</i>     | 4.9                                       | 3.2               | 0.65                                     | 94         | 59                | <0.0001                       |
| <i>mir-71(n4115)</i>     | 2.5                                       | 3.2               | 1.29 <sup>d</sup>                        | 79         | 93                | <0.0001 <sup>d</sup>          |
| <i>wt</i>                | 6.3                                       | 4.2               | 0.66                                     | 86         | 87                | <0.0001                       |
| <i>daf-12(rh61rh412)</i> | 4.8                                       | 2.8               | 0.58                                     | 85         | 91                | <0.0001                       |
| <i>kri-1(ok1251)</i>     | 3.0                                       | 2.7               | 0.91                                     | 74         | 73                | 0.0002                        |
| <i>mir-71(n4115)</i>     | 2.3                                       | 3.0               | 1.29                                     | 89         | 92                | 0.0074                        |
| <i>wt</i>                | 4.5                                       | 3.4               | 0.76                                     | 40         | 37                | <0.0001                       |
| <i>daf-12(rh61rh412)</i> | 5.4                                       | 3.2               | 0.59                                     | 48         | 40                | <0.0001                       |
| <i>kri-1(ok1251)</i>     | 2.6                                       | 1.7               | 0.65                                     | 50         | 51                | <0.0001                       |
| <i>mir-71(n4115)</i>     | 1.8                                       | 2.2               | 1.20                                     | 50         | 50                | 0.016                         |
| <i>wt</i>                | 4.8                                       | 2.8               | 0.59                                     | 107        | 124               | <0.0001                       |
| <i>daf-12(rh61rh412)</i> | 4.1                                       | 4.1               | 1.00                                     | 42         | 36                | n.s.                          |
| <i>kri-1(ok1251)</i>     | 4.1                                       | 3.2               | 0.78                                     | 134        | 125               | <0.0001                       |
| <i>mir-71(n4115)</i>     | 1.4                                       | 2.0               | 1.37                                     | 144        | 126               | <0.0001                       |

<sup>a</sup> All strains were rendered sterile by *cdc-25.1* RNAi treatment during development to disrupt germline proliferation (see Methods).

<sup>b</sup> Each shade-separated block represents an independent experiment.

<sup>c</sup> Days are counted starting at day 2 of adulthood, following *vhp-1* knock-down or exposure to empty vector (EV).

<sup>d</sup> Red values denote instances where *vhp-1* RNAi has a positive effect on survival. Previous results have demonstrated (in *kgb-1* mutants) that this is due to activation of the p38 ortholog, PMK-1, a protective (age-invariably) MAPK also negatively regulated by VHP-1 (Twumasi-Boateng et al., 2012). In the absence of the detrimental effects of activated KGB-1, this protection become a dominant outcome of *vhp-1* RNAi.
