# Supplementary material
Source: publisher figshare collection journal article supplement (https://gsajournals.figshare.com/articles/dataset/_/10273436)
Supplement: Supplementary file 2 [file 2]

**Table S2. Involvement of *mir-71* and the microRNA machinery in KGB-1's detrimental effects on lifespan of fertile and sterile worms.**

| Strain                                                          | Median Lifespan (days <sup>a</sup> ) |                   | Median lifespan fold change <sup>d</sup> | n          |                   | Log-Rank p-value <sup>d</sup> |
|-----------------------------------------------------------------|--------------------------------------|-------------------|------------------------------------------|------------|-------------------|-------------------------------|
|                                                                 | EV control                           | <i>vhp-1</i> RNAi |                                          | EV control | <i>vhp-1</i> RNAi |                               |
| <i>wt</i> <sup>b</sup>                                          | 15.8                                 | 7.9               | 0.50                                     | 116        | 129               | <0.0001                       |
| <i>wt; cdc-25.1(RNAi)</i> <sup>c</sup>                          | 20.1                                 | 9.4               | 0.47                                     | 103        | 146               | <0.0001                       |
| <i>wt; cdc-25.1(RNAi)</i> <sup>c</sup>                          | 22.3                                 | 8.1               | 0.37                                     | 81         | 115               | <0.0001                       |
| <i>kgb-1(km21); cdc-25.1(RNAi)</i>                              | 17.2                                 | 6.7               | 0.39                                     | 116        | 113               | <0.0001                       |
| <i>daf-16(mu86); cdc-25.1(RNAi)</i>                             | 9.7                                  | 7.8               | 0.81                                     | 120        | 118               | <0.0001                       |
| <i>mir-71(n4115); cdc-25.1(RNAi)</i>                            | 5.7                                  | 7.4               | 1.31 <sup>d</sup>                        | 113        | 118               | <0.0001 <sup>d</sup>          |
| <i>wt</i> <sup>e</sup> ; <i>cdc-25.1(RNAi)</i>                  | 21.3                                 | 9.2               | 0.43                                     | 75         | 25                | <0.0001                       |
| <i>mir-71(n4115)</i> <sup>e</sup> ; <i>cdc-25.1(RNAi)</i>       | 7.2                                  | 7.8               | 1.08                                     | 53         | 68                | 0.0146                        |
| <i>mir-71 o.e.[nls286]</i> <sup>e</sup> ; <i>cdc-25.1(RNAi)</i> | 23.5                                 | 11.0              | 0.47                                     | 66         | 55                | <0.0001                       |
| <i>wt</i> <sup>e</sup> ; <i>cdc-25.1(RNAi)</i>                  | 11.8                                 | 6.3               | 0.54                                     | 78         | 92                | <0.0001                       |
| <i>mir-71(n4115)</i> <sup>e</sup> ; <i>cdc-25.1(RNAi)</i>       | 4.1                                  | 5.9               | 1.44                                     | 94         | 100               | <0.0001                       |
| <i>mir-71 o.e.[nls286]</i> <sup>e</sup> ; <i>cdc-25.1(RNAi)</i> | 21.5                                 | 7.2               | 0.33                                     | 96         | 99                | <0.0001                       |
| <i>wt</i> <sup>e</sup> ; <i>cdc-25.1(RNAi)</i>                  | 9.1                                  | 6.7               | 0.74                                     | 89         | 88                | <0.0001                       |
| <i>mir-71(n4115)</i> <sup>e</sup> ; <i>cdc-25.1(RNAi)</i>       | 4.3                                  | 6.6               | 1.53                                     | 94         | 95                | <0.0001                       |
| <i>mir-71 o.e.[nls286]</i> <sup>e</sup> ; <i>cdc-25.1(RNAi)</i> | 16.6                                 | 7.4               | 0.45                                     | 88         | 92                | <0.0001                       |
| <i>wt</i>                                                       | 21.5                                 | 13.3              | 0.62                                     | 157        | 134               | <0.0001                       |
| <i>kgb-1(km21)</i>                                              | 12.7                                 | 11.8              | 0.93                                     | 112        | 133               | n.s.                          |
| <i>daf-16(mu86)</i>                                             | 13.4                                 | 13.1              | 0.97                                     | 154        | 134               | n.s.                          |
| <i>mir-71(n4115)</i>                                            | 7.6                                  | 7.6               | 1.01                                     | 161        | 152               | n.s.                          |
| <i>wt</i>                                                       | 17.4                                 | 14.1              | 0.81                                     | 115        | 132               | <0.0001                       |
| <i>kgb-1(km21)</i>                                              | 10.8                                 | 11.2              | 1.03                                     | 94         | 107               | n.s.                          |
| <i>mir-71(n4115)</i>                                            | 10.7                                 | 9.8               | 0.92                                     | 124        | 128               | n.s.                          |
| <i>wt</i>                                                       | 18.6                                 | 13.9              | 0.75                                     | 137        | 129               | <0.0001                       |
| <i>kgb-1(km21)</i>                                              | 17.4                                 | 16.8              | 0.96                                     | 125        | 98                | n.s.                          |
| <i>daf-16(mu86)</i>                                             | 14.5                                 | 15.9              | 1.10                                     | 142        | 129               | n.s.                          |
| <i>mir-71(n4115)</i>                                            | 11.2                                 | 11.1              | 0.99                                     | 138        | 133               | n.s.                          |
| <i>alg-1(tm492)</i>                                             | 12.7                                 | 10.6              | 0.84                                     | 115        | 65                | n.s.                          |
| <i>wt</i>                                                       | 17.7                                 | 16.0              | 0.91                                     | 113        | 108               | 0.0027                        |
| <i>kgb-1(km21)</i>                                              | 13.5                                 | 13.2              | 0.98                                     | 96         | 80                | n.s.                          |
| <i>mir-71(n4115)</i>                                            | 8.1                                  | 6.9               | 0.86                                     | 116        | 118               | <0.0001                       |
| <i>alg-1(tm492)</i>                                             | 11.1                                 | 11.4              | 1.03                                     | 107        | 64                | n.s.                          |
| <i>alg-2(ok304)</i>                                             | 16.9                                 | 13.0              | 0.77                                     | 113        | 120               | <0.0001                       |
| <i>drsh-1(ok369)</i>                                            | 5.4                                  | 3.8               | 0.71                                     | 135        | 105               | <0.0001                       |
| <i>pash-1(mj100)</i>                                            | 9.9                                  | 10.4              | 1.06                                     | 64         | 48                | n.s.                          |

<sup>a</sup> Days are counted starting at day 2 of adulthood, following *vhp-1* knock-down (or exposure to empty vector control).

<sup>b</sup> Each shade-separated block represents an independent experiment.

<sup>c</sup> *cdc-25.1* RNAi exposure during development was used to disrupt germline proliferation, rendering worms sterile. In color-shaded blocks, all experiments were carried out with sterile worms following development on *cdc-25.1* RNAi.

<sup>d</sup> Red values denote instances where *vhp-1* RNAi has a positive effect on survival. This is presumed to be due to activation of the p38 ortholog PMK-1, a protective (age-invariably) MAPK also negatively regulated by VHP-1 (Twumasi-Boateng et al., 2012). In the absence of the detrimental effects of activated KGB-1, this protection become the dominant outcome of *vhp-1* RNAi.

<sup>e</sup> In marked experiments, lifespan assays were carried out with continuous exposure to EV/*cdc-25.1* or *vhp-1/cdc-25.1* RNAi mixtures, rather than transferred to dead *E. coli* after two days on RNAi.
